# Supplementary material
Source: PubMed Central journal article supplement (PMC4313788)
Supplement: NIHMS196333-supplement-SI.pdf [file NIHMS196333-supplement-SI.pdf]

## Supplementary Information

### Unusual transformations in the biosynthesis of the antibiotic phosphinothricin tripeptide

Joshua A.V. Blodgett<sup>1</sup>, Paul M. Thomas<sup>2</sup>, Gongyong Li<sup>2#</sup>, Juan E. Velasquez<sup>2</sup>, Wilfred A. van der Donk<sup>2</sup>, Neil L. Kelleher<sup>2</sup> and William W. Metcalf<sup>1\*</sup>

<sup>1</sup>Department of Microbiology, University of Illinois at Urbana-Champaign, B103 CLSL, 601 S. Goodwin, Urbana, IL 61801

<sup>2</sup>Department of Chemistry, University of Illinois at Urbana-Champaign, 600 S. Matthews Ave., Urbana, IL 61801

\*Corresponding Author: Department of Microbiology, University of Illinois at Urbana-Champaign, 601 South Goodwin Avenue, Urbana, IL 61801, Phone: 217-244-1943, Fax: 217-244-6697, email: [metcalf@uiuc.edu](mailto:metcalf@uiuc.edu)

<sup>#</sup>Present Address: Shanghai Chemspec Corp., No. 3 Lan 1273, Tong Pu Road, Shanghai, China 200333.

## Supplementary Figures

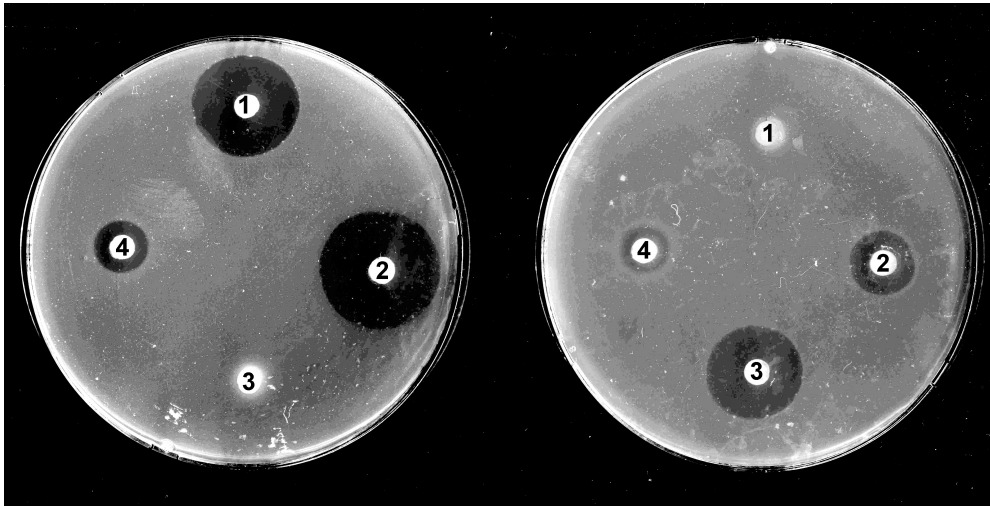

**Supplementary Figure 1.** Bioassays of agar cores cut from ISP2 plates inoculated with *Streptomyces viridochromogenes*  $\Delta php$  mutants and plated against PTT-sensitive *Bacillus subtilis* indicator strain ATCC6633. Left bioassay plate, core 1 WM6548 ( $\Delta phpJ$ ), core 2 WM5302 (parent strain [+ control]), core 3 WM6601 ( $\Delta phpD$ ), core 4 WM6546 ( $\Delta phpF$ ). Right bioassay plate, core 1 WM6604 ( $\Delta phpH$ ), core 2 WM6549 ( $\Delta phpG$ ), core 3 WM6547 ( $\Delta phpC$ ), core 4 WM6602 ( $\Delta phpE$ ).

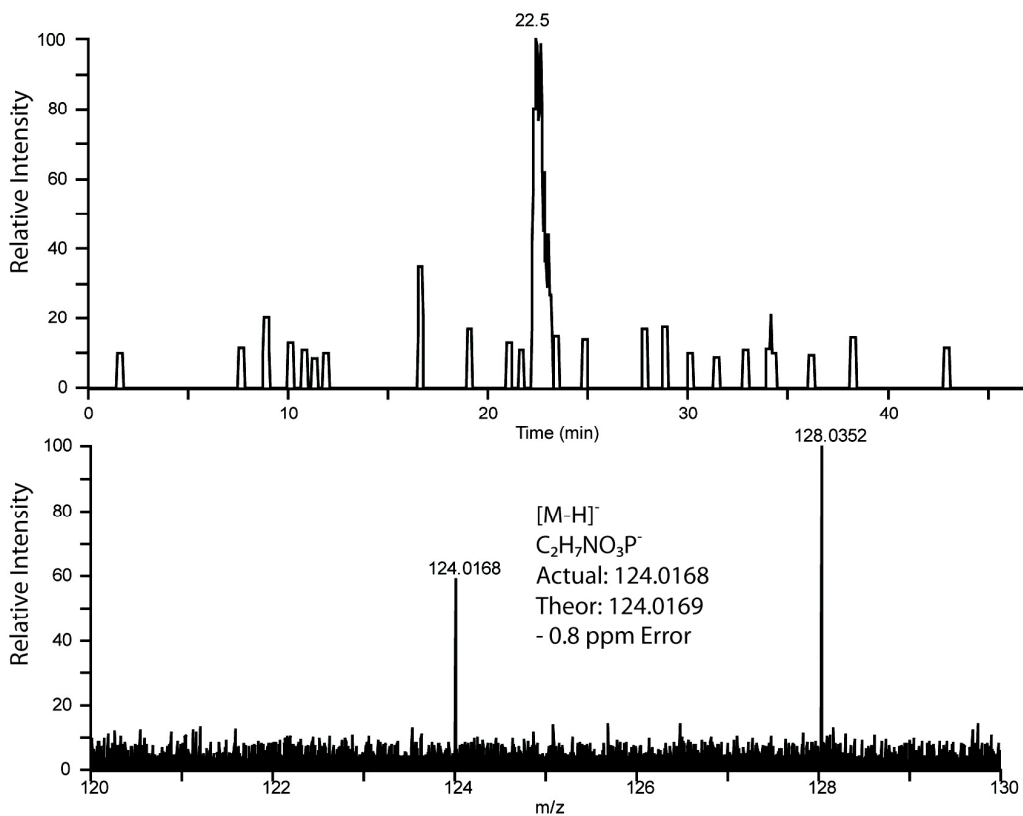

**Supplementary Figure 2.** LC/MS detection of 2-aminoethylphosphonate from culture supernatants of a *S. viridochromogenes*  $\Delta$ *phpC* mutant. Upper panel, selected ion chromatogram for 2-aminoethylphosphonate  $\pm$  0.01 Da from an injection of 50  $\mu$ L of concentrated WM6492 supernatant. Lower panel, summed mass spectra from chromatographic peak showing HRMS errors.

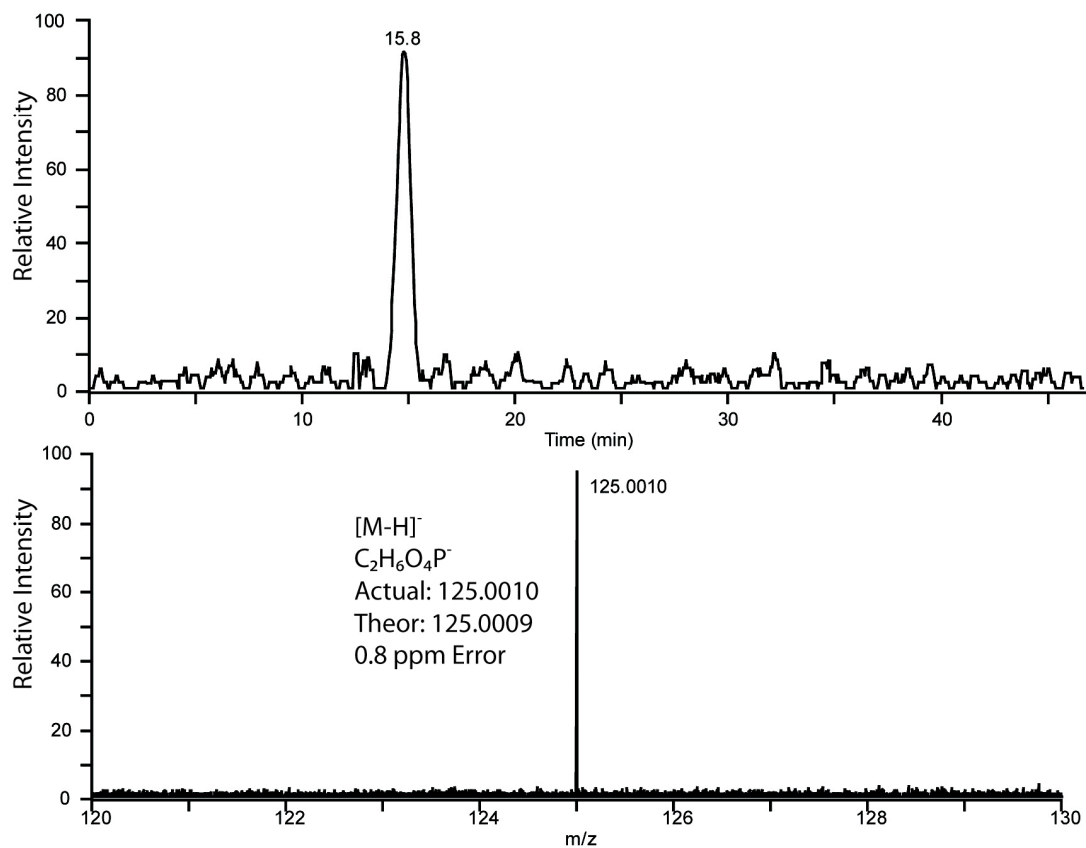

**Supplementary Figure 3.** LC/MS detection of hydroxyethylphosphonate from the *in vitro* reduction of phosphonoacetaldehyde by His-PhpC. Upper panel, selected ion chromatogram for 2-hydroxyethylphosphonate  $\pm$  0.01 Da from an injection of 50  $\mu$ L reaction mixture. Lower panel, summed mass spectra from chromatographic peak showing HRMS errors.

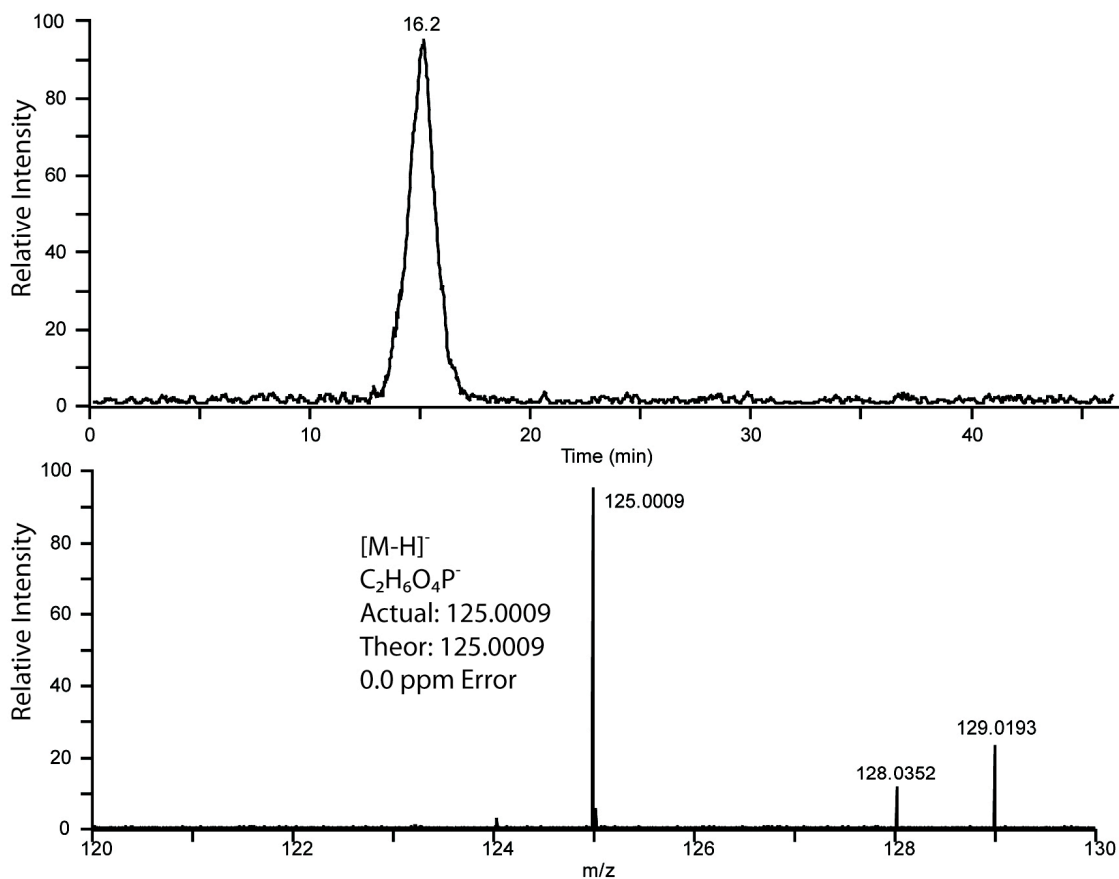

**Supplementary Figure 4.** LC/MS detection of 2-hydroxyethylphosphonate from culture supernatants of a *S. viridochromogenes*  $\Delta$ *phpD* mutant. Upper panel, selected ion chromatogram for 2-hydroxyethylphosphonate  $\pm$  0.01 Da from an injection of 50  $\mu$ L of concentrated WM6601 supernatant. Lower panel, summed mass spectra from chromatographic peak showing HRMS errors.

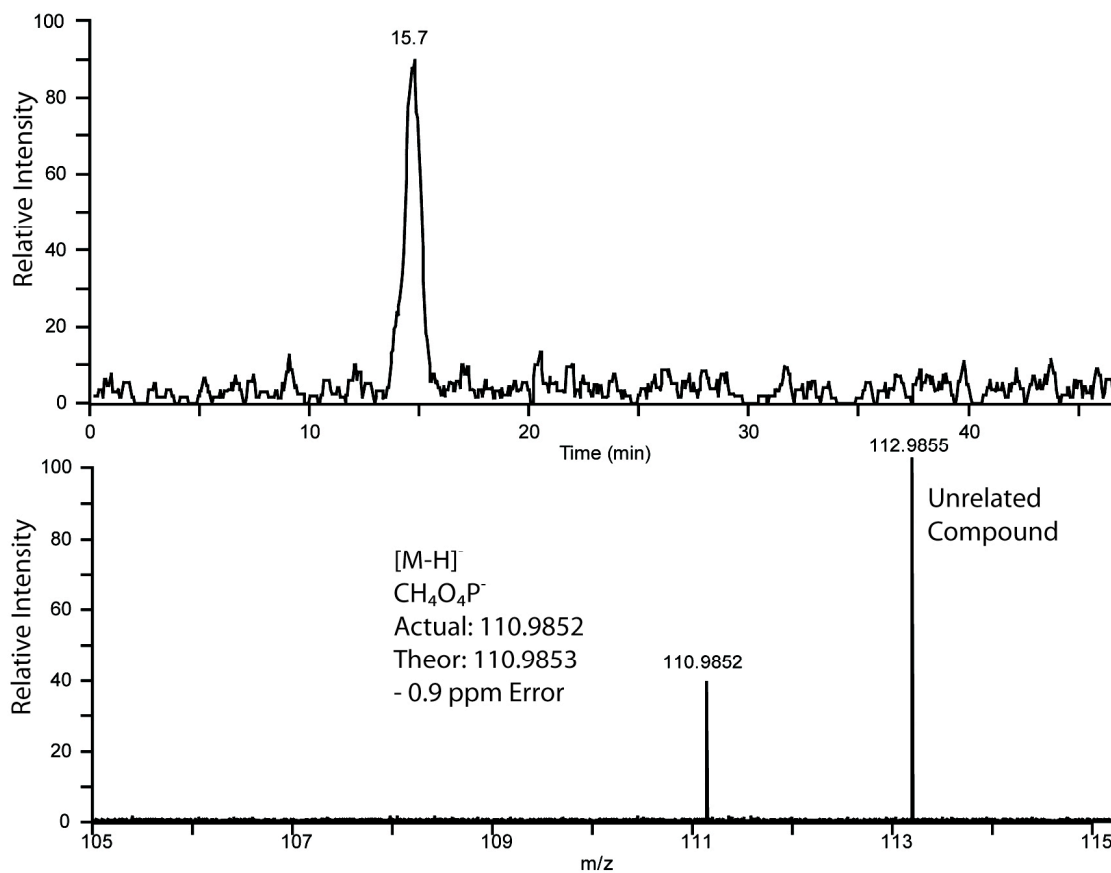

**Supplementary Figure 5.** LC/MS detection of hydroxymethylphosphonate from the *in vitro* cleavage of hydroxyethylphosphonate by PhpD. Upper panel, selected ion chromatogram for hydroxymethylphosphonate  $\pm$  0.01 Da from an injection of 50  $\mu$ L of reaction mixture. Lower panel, summed mass spectra from chromatographic peak showing HRMS errors.

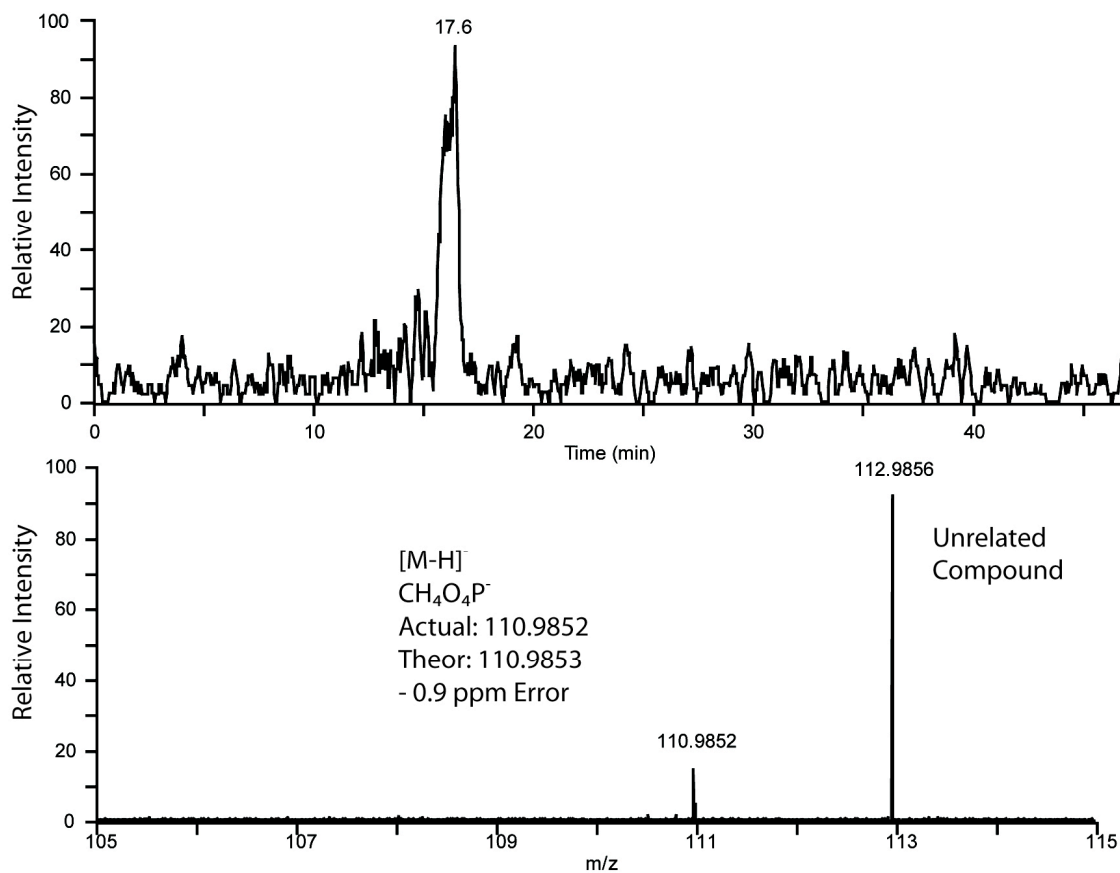

**Supplementary Figure 6.** LC/MS detection of hydroxymethylphosphonate from culture supernatants of a *S. viridochromogenes*  $\Delta$ *phpE* mutant. Upper panel, selected Ion Chromatogram for hydroxymethylphosphonate  $\pm$  0.01 Da from an injection of 50  $\mu$ L of concentrated WM6602 supernatant. Lower panel, summed mass spectra from chromatographic peak showing HRMS errors.

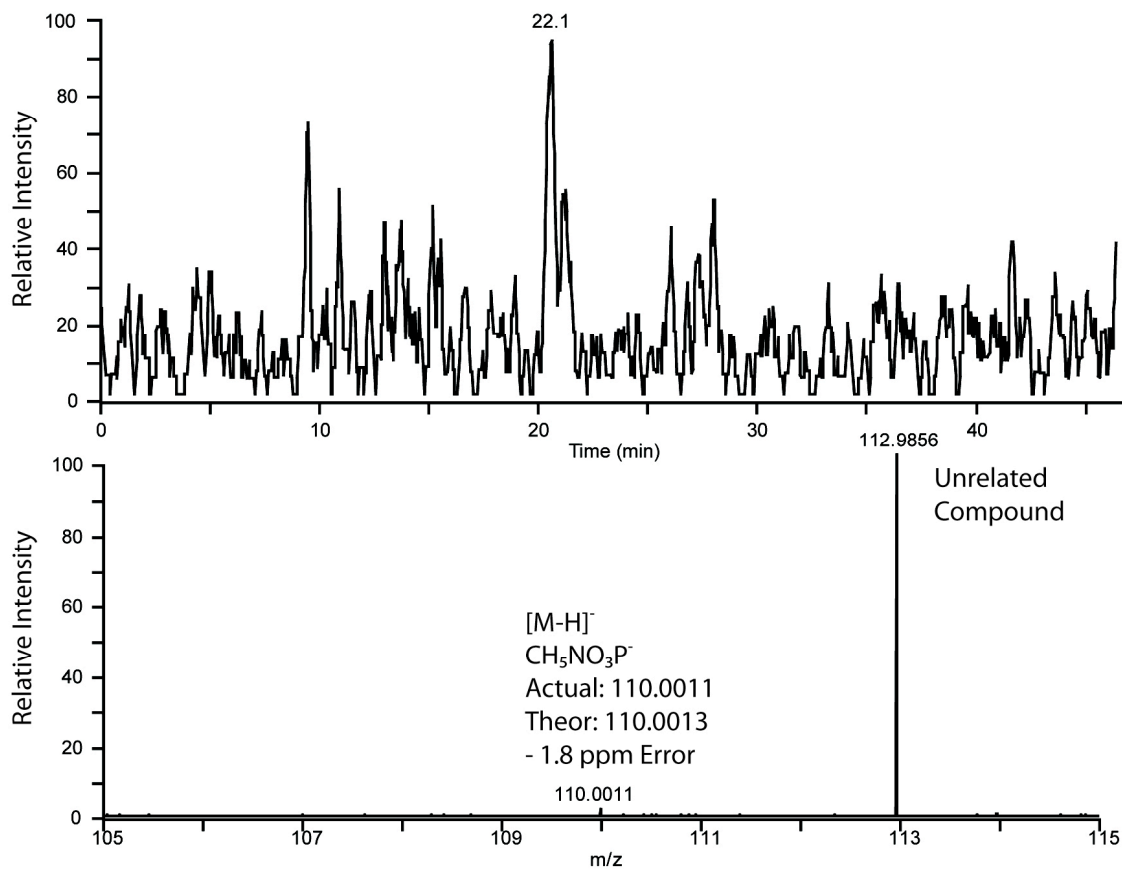

**Supplementary Figure 7.** LC/MS detection of aminomethylphosphonate from culture supernatants of a *S. viridochromogenes*  $\Delta$ *phpJ* mutant. Upper panel, selected ion chromatogram for aminomethylphosphonate  $\pm$  0.01 Da from an injection of 50  $\mu$ L of concentrated WM6488 supernatant. Lower panel, summed mass spectra from chromatographic peak showing HRMS errors.



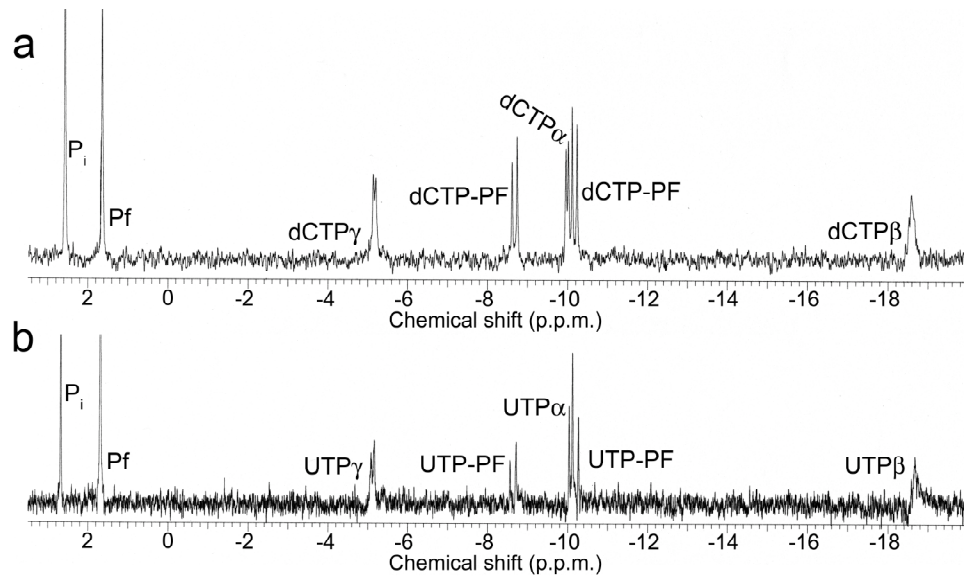

**Supplementary Figure 8.** <sup>31</sup>P NMR results of assays illustrating the incomplete conversion of nucleotides other than CTP to phosphonoformylated products with His-PhpF. **(a)** A reaction containing His-PhpF, inorganic pyrophosphatase, dCTP and phosphonoformate showing the partial conversion of phosphonoformate (Pf) and dCTP into dCMP-5'-phosphonoformate (dCMP-PF) and phosphate (P<sub>i</sub>). **(b)** A reaction containing His-PhpF, inorganic pyrophosphatase, UTP and phosphonoformate showing the partial conversion of phosphonoformate and UTP into UMP-5'-phosphonoformate (UTP-PF) and phosphate. The putative α, β, and γ designations of the nucleotide phosphorus nuclei have been assigned by comparison to those analogously found in ATP<sup>1</sup>. The peaks associated with dCMP-PF and UMP-PF were assigned by comparison those analogously found for CMP-5'-phosphonoformate. In both spectra, the tops of the phosphate and phosphonoformate peaks are not shown to fit them to reasonably sized figures.

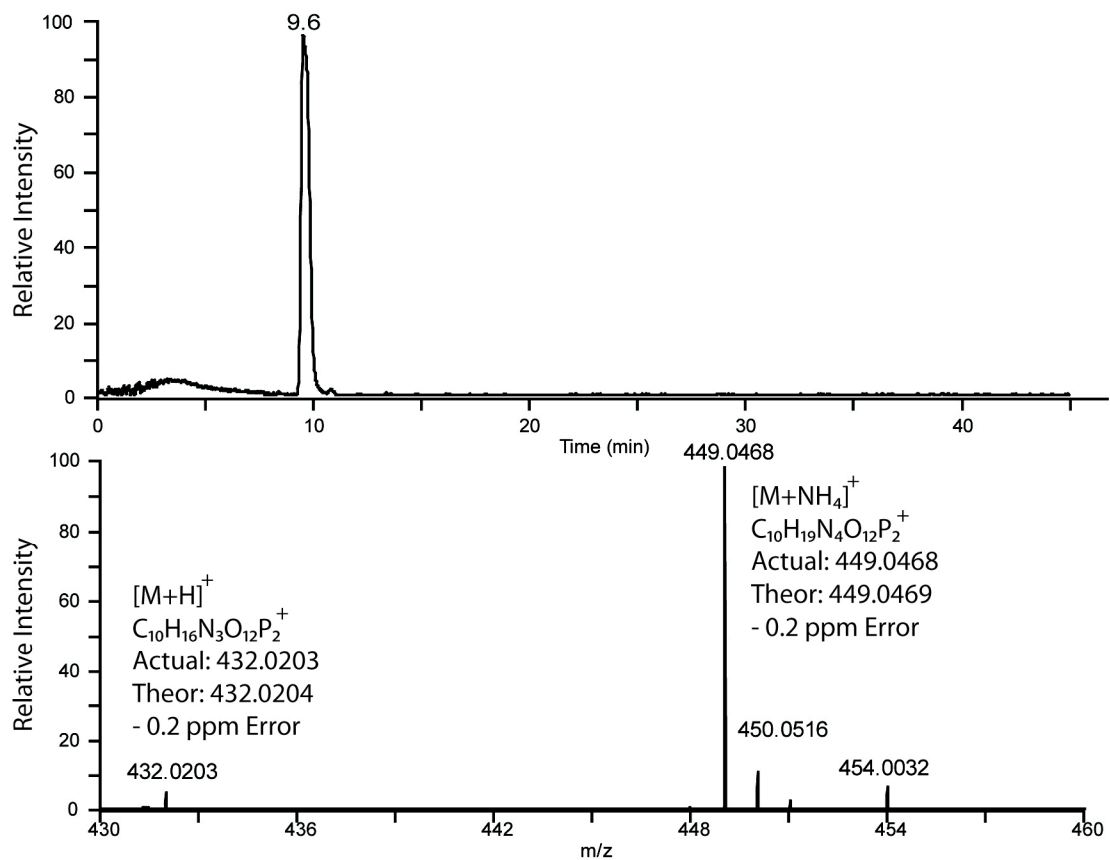

**Supplementary Figure 9.** LC/MS detection of CMP-5'-PF from the *in vitro* assay of His-PhpF. Upper panel, selected ion chromatogram for CMP-5'-PF +/- 0.01 Da from an injection of 50  $\mu$ L of reaction mixture. Lower panel, summed mass spectra from chromatographic peak showing HRMS errors for both the protonated species and the ammonium adduct.

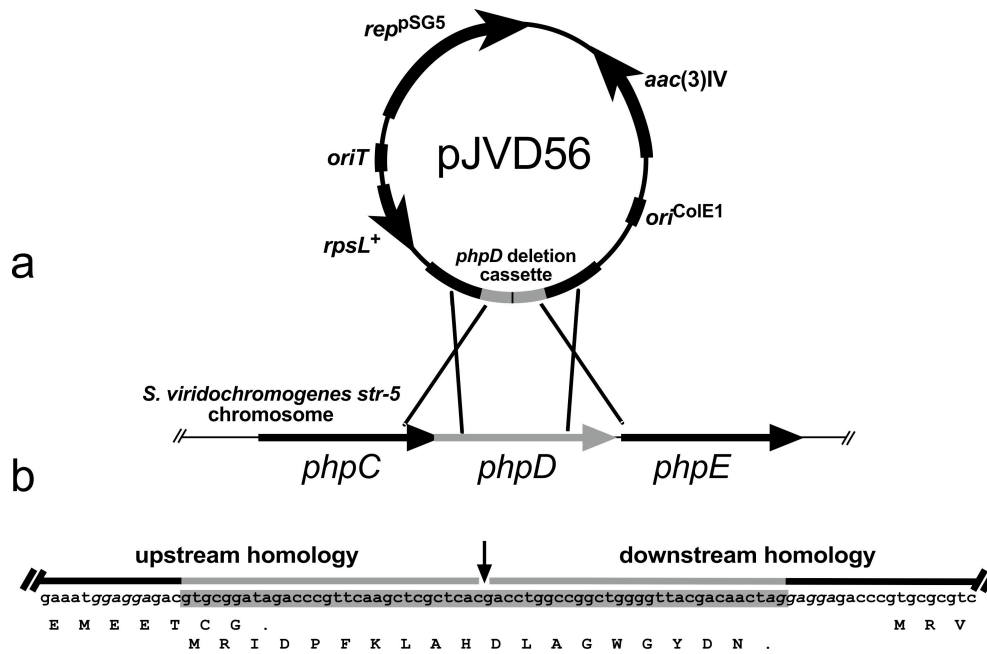

**Supplementary Figure 10.** Scheme used for the deletion of phosphinothricin tripeptide biosynthetic genes. **(a)** The deletion of *phpD* has been chosen as a specific example, although all other deletions constructed for this work were similarly made. The gray areas within the ‘deletion cassette’ denote DNA sequence encoding portions of *phpD* (not to scale). The dark line separating the upstream and downstream regions of homology indicates the point of where the two fragments were joined by PCR fusion. Tandem recombination events between the chromosome and the deletion plasmid allows for the unmarked removal of most of the *phpD* coding sequence. **(b)** The chromosomal scar resulting from unmarked mutagenesis. The arrow indicates the junction between the upstream and downstream homology regions originally encoded by the deletion cassette. The nucleotides in gray encode the truncated PhpD protein, for which the complete translated sequence is presented directly below. Fragments of both the 3’ terminus of *phpC* and the 5’ terminus of *phpE* and the corresponding amino acid residues they encode have been included. They are shown clearly and illustrate the complicating issue of overlapping sequences in the PTT gene cluster. Stop codons have been designated by periods and putative ribosome-binding sites have been denoted in italics.

**Supplementary Tables**

**Supplementary Table 1. Microorganisms and plasmids used in this study**

| Strain or plasmid                     | Relevant characteristics                                                                                                                                                                                                                                                                                                                               | Source or reference <sup>a</sup>       |
|---------------------------------------|--------------------------------------------------------------------------------------------------------------------------------------------------------------------------------------------------------------------------------------------------------------------------------------------------------------------------------------------------------|----------------------------------------|
| <i>Escherichia coli</i>               |                                                                                                                                                                                                                                                                                                                                                        |                                        |
| DH5 $\alpha$ / $\lambda$ pir          | $\lambda$ pir/ $\Phi$ 80dlacZ $\Delta$ M15, $\Delta$ (lacZYA-argF)U169, <i>recA1</i> , <i>hsdR17</i> , <i>deoR</i> , <i>thi-1</i> , <i>supE44</i> , <i>gyrA96</i> , <i>relA1</i>                                                                                                                                                                       | <sup>2</sup>                           |
| Rosetta(DE3)pLysS                     | F <sup>-</sup> , <i>ompT</i> , <i>hsdS<sub>B</sub></i> (r <sub>B</sub> <sup>-</sup> m <sub>B</sub> <sup>-</sup> ), <i>gal</i> , <i>dcm</i> (DE3)/ pLysSRARE (Cam <sup>R</sup> )                                                                                                                                                                        | Novagen                                |
| WM3780                                | <i>dam-3</i> , <i>dcm-9</i> , <i>metB1</i> , <i>galK2</i> , <i>galT27</i> , <i>lacY1</i> , <i>tsx-78</i> , <i>supE44</i> , <i>thi-1</i> , <i>mel-1</i> , <i>tonA31 attHK:: pJK202<math>\Delta</math>(oriR6K-aadA)::Frt</i>                                                                                                                             | <sup>3</sup>                           |
| WM6026                                | <i>lacI<sup>q</sup></i> , <i>rrnB3</i> , $\Delta$ lacZ4787, <i>hsdR514</i> , $\Delta$ araBAD567, $\Delta$ rhaBAD568, <i>rph-1</i> , <i>att<math>\lambda</math>::pAE12(<math>\Delta</math>oriR6K-cat::Frt5)</i> , $\Delta$ endA::Frt, <i>uidA(<math>\Delta</math>MluI)::pir</i> , <i>attHK::pJK1006<math>\Delta</math>(oriR6K-cat::Frt5; trfA::Frt)</i> | J.K. Zhang and W. Metcalf, unpublished |
| WM4491                                | Rosetta(DE3)pLysS/pJVD18                                                                                                                                                                                                                                                                                                                               | This study                             |
| WM6047                                | Rosetta(DE3)pLysS/pJVD26                                                                                                                                                                                                                                                                                                                               | This study                             |
| WM5392                                | Rosetta(DE3)pLysS/pJVD30                                                                                                                                                                                                                                                                                                                               | This study                             |
| <i>Bacillus subtilis</i>              |                                                                                                                                                                                                                                                                                                                                                        |                                        |
| ATCC6633                              | PTT-sensitive bioassay strain                                                                                                                                                                                                                                                                                                                          | ATCC                                   |
| WM4445                                | PTT-resistant derivative of ATCC 6633                                                                                                                                                                                                                                                                                                                  | <sup>3</sup>                           |
| <i>Streptomyces coelicolor</i> A3(2)  |                                                                                                                                                                                                                                                                                                                                                        |                                        |
|                                       | Wild type (NRRL B-16638)                                                                                                                                                                                                                                                                                                                               | ARS                                    |
| <i>Streptomyces lividans</i> 66       |                                                                                                                                                                                                                                                                                                                                                        |                                        |
| WM6409                                | Wild type (NRRL B-16148)<br><i>S. lividans</i> /pJVD63                                                                                                                                                                                                                                                                                                 | ARS<br>This study                      |
| <i>Streptomyces hygroscopicus</i>     |                                                                                                                                                                                                                                                                                                                                                        |                                        |
|                                       | Wild type (ATCC 21705)                                                                                                                                                                                                                                                                                                                                 | ATCC                                   |
| <i>Streptomyces viridochromogenes</i> |                                                                                                                                                                                                                                                                                                                                                        |                                        |
| WM5302                                | Wild type (DSM 40736)<br><i>S. viridochromogenes str-5</i>                                                                                                                                                                                                                                                                                             | DSM<br>This study                      |
| WM6547                                | <i>S. viridochromogenes str-5 <math>\Delta</math>phpC</i>                                                                                                                                                                                                                                                                                              | This study                             |
| WM6601                                | <i>S. viridochromogenes str-5 <math>\Delta</math>phpD</i>                                                                                                                                                                                                                                                                                              | This study                             |
| WM6602                                | <i>S. viridochromogenes str-5 <math>\Delta</math>phpE</i>                                                                                                                                                                                                                                                                                              | This study                             |
| WM6546                                | <i>S. viridochromogenes str-5 <math>\Delta</math>phpF</i>                                                                                                                                                                                                                                                                                              | This study                             |
| WM6549                                | <i>S. viridochromogenes str-5 <math>\Delta</math>phpG</i>                                                                                                                                                                                                                                                                                              | This study                             |
| WM6604                                | <i>S. viridochromogenes str-5 <math>\Delta</math>phpH</i>                                                                                                                                                                                                                                                                                              | This study                             |
| WM6548                                | <i>S. viridochromogenes str-5 <math>\Delta</math>phpJ</i>                                                                                                                                                                                                                                                                                              | This study                             |
| Plasmids                              |                                                                                                                                                                                                                                                                                                                                                        |                                        |
| pET11a                                | Amp <sup>R</sup> <i>E. coli</i> protein expression vector                                                                                                                                                                                                                                                                                              | Novagen                                |
| pET15b                                | Amp <sup>R</sup> <i>E. coli</i> histidine-tag fusion expression vector                                                                                                                                                                                                                                                                                 | Novagen                                |
| pET-DUET-1                            | Amp <sup>R</sup> <i>E. coli</i> protein expression vector                                                                                                                                                                                                                                                                                              | Novagen                                |
| pAE4                                  | Apr <sup>R</sup> , <i>oriT</i> , <i>oriR6K</i> , $\Phi$ C31attP, $\Phi$ C31int, $\lambda$ attP vector                                                                                                                                                                                                                                                  | <sup>4</sup>                           |

---

|             |                                                                                                                                                                                                      |            |
|-------------|------------------------------------------------------------------------------------------------------------------------------------------------------------------------------------------------------|------------|
| pPB37       | Amp <sup>R</sup> <i>E. coli</i> cloning vector, <i>oriR6K</i>                                                                                                                                        | 5          |
| pSH19       | Thio <sup>R</sup> <i>Streptomyces</i> protein over-expression vector                                                                                                                                 | 6          |
| pKC1139     | Apr <sup>R</sup> , <i>oriT</i> , <i>rep</i> <sup>SG5(ts)</sup> , <i>rep</i> <sup>pUC</sup> shuttle vector                                                                                            | 7          |
| pOJ260      | Apr <sup>R</sup> , <i>oriT</i> , <i>rep</i> <sup>pUC</sup> <i>E. coli</i> cloning vector                                                                                                             | 7          |
| fosmid 5-9G | Contains PTT biosynthetic gene cluster                                                                                                                                                               | 3          |
| pJVD17      | pET11a digested with BamHI/XbaI and ligated to <i>ppd</i> PCR product amplified from <i>B.fragilis</i> chromosomal DNA with primers Fragilisppd FOR and Fragilisppd REV and digested with BglII/XbaI | This study |
| pJVD18      | pJVD17 digested with BamHI/XbaI and ligated to <i>ppm</i> PCR product amplified from <i>B.fragilis</i> chromosomal DNA with primers Fragilisppm FOR and Fragilisppm REV and digested with BglII/XbaI | This study |
| pJVD25      | pET-DUET digested with BglII/XbaI and ligated to <i>phpC</i> PCR product amplified from fosmid 5-9G with primers phpC FOR and phpC REV and digested with XbaI/BglII                                  | This study |
| pJVD26      | pET-DUET digested with BglII/XbaI and ligated to <i>phpD</i> PCR product amplified from fosmid 5-9G with primers phpD FOR and phpD REV and digested with XbaI/BglII                                  | This study |
| pJVD29      | pET-DUET digested with BglII/XbaI and ligated to <i>phpF</i> PCR product amplified from fosmid 5-9G with primers phpF FOR and phpF REV and digested with XbaI/BglII                                  | This study |
| pJVD30      | pJVD29 digested to release <i>phpF</i> with BglII/NdeI, ligated to pET15b digested with BamHI/NdeI                                                                                                   | This study |
| pJVD39      | pKC1139 digested with ClaI and ligated to <i>rpsLG</i> PCR product amplified from <i>S. coelicolor</i> genome with primers Sc rpsLG5' and Sc rpsLG3' and digested with ClaI                          | This study |
| pJVD40      | pJVD39 digested with BamHI/EcoRI and ligated to fusion PCR generated <i>phpE</i> deletion cassette digested with BamHI/EcoRI                                                                         | This study |
| pJVD41      | pOJ260 digested with ClaI and ligated to <i>rpsLG</i> fragment from pJVD40 released by ClaI digest                                                                                                   | This study |
| pJVD42      | pJVD41 digested with EcoRV/XbaI and ligated to fusion PCR generated <i>phpC</i> deletion cassette digested with EcoRV/XbaI                                                                           | This study |
| pJVD43      | pJVD41 digested with EcoRI/XbaI and ligated to fusion PCR generated <i>phpD</i> deletion cassette digested with EcoRI/XbaI                                                                           | This study |
| pJVD44      | pJVD41 digested with EcoRI/XbaI and ligated to fusion PCR generated <i>phpF</i> deletion cassette digested with EcoRI/XbaI                                                                           | This study |

---

|          |                                                                                                                                                                                           |            |
|----------|-------------------------------------------------------------------------------------------------------------------------------------------------------------------------------------------|------------|
| pJVD45   | pJVD41 digested with EcoRI/XbaI and ligated to fusion PCR generated <i>phpG</i> deletion cassette digested with EcoRI/XbaI                                                                | This study |
| pJVD46   | pJVD41 digested with EcoRI/XbaI and ligated to fusion PCR generated <i>phpH</i> deletion cassette digested with EcoRI/XbaI                                                                | This study |
| pJVD47   | pJVD41 digested with EcoRI/XbaI and ligated to fusion PCR generated <i>phpJ</i> deletion cassette digested with EcoRI/XbaI                                                                | This study |
| pJVD48   | pSH19 digested with SpeI and ligated to pPB37 digested with XbaI, yielding a fusion of both complete plasmids                                                                             | This study |
| pJVD52.1 | pKC1139 digested with BglII and ligated to <i>rpsL</i> PCR product amplified from <i>S.coelicolor</i> genome with primers Sc <i>rpsL</i> 5' and Sc <i>rpsL</i> 3' and digested with BglII | This study |
| pJVD53   | pJVD48 digested with AscI and ligated to <i>oriT</i> fragment from pAE4 released by AscI digest                                                                                           | This study |
| pJVD56   | pJVD52.1 digested with EcoRI/XbaI and ligated to the EcoRI/XbaI flanked <i>phpD</i> deletion cassette of pJVD43                                                                           | This study |
| pJVD59   | pJVD25 digested to release <i>phpC</i> with BglII/NdeI , ligated to pET15b digested with BamHI/NdeI                                                                                       | This study |
| pJVD63   | pJVD59 digested to release <i>N-hisphpC</i> with EcoRI/XbaI, ligated to pJVD53 digested with EcoRI/XbaI                                                                                   | This study |
| pJVD73   | pJVD52.1 digested with EcoRV/XbaI and ligated to the EcoRV/XbaI flanked <i>phpC</i> deletion cassette of pJVD42                                                                           | This study |
| pJVD75   | pJVD52.1 digested with EcoRI/XbaI and ligated to the EcoRI/XbaI flanked <i>phpF</i> deletion cassette of pJVD44                                                                           | This study |
| pJVD76   | pJVD52.1 digested with EcoRI/XbaI and ligated to the EcoRI/XbaI flanked <i>phpG</i> deletion cassette of pJVD45                                                                           | This study |
| pJVD77   | pJVD52.1 digested with EcoRI/XbaI and ligated to the EcoRI/XbaI flanked <i>phpH</i> deletion cassette of pJVD46                                                                           | This study |
| pJVD78   | pJVD52.1 digested with EcoRI/XbaI and ligated to the EcoRI/XbaI flanked <i>phpJ</i> deletion cassette of pJVD47                                                                           | This study |

<sup>a</sup>ATCC, American Type Culture Collection, Manassas, Va; ARS, U.S. Department of Agriculture Agricultural Resource Service, Peroria, Ill.; DSM, Deutsche Sammlung von Mikroorganismen, Braunschweig, Germany.

**Supplementary Table 2. Oligonucleotides used in this study**

| Oligonucleotide | DNA sequence                                                               |
|-----------------|----------------------------------------------------------------------------|
| phpC KO F1      | GGCGCGTCTAGAGCCCGACAGCCGGGAGATC                                            |
| phpC KO F2      | GTTTCCCGGTGAACTGCTGCGATCGGAAATGGAGGAG                                      |
| phpC KO R1      | GGCGCGCCGATATCGAGGCCATGGAGGCCGC                                            |
| phpC KO R2      | TCTCCTCCATTTCCGATCGCAGCAGTTCACCGGGAAACAC                                   |
| phpD KO F1      | GGCGCGCCTCTAGACCACACCGGACAGCGTCCG                                          |
| phpD KO F2      | CCC GTTCAAGCTCGCTCACGACCTGGCCGGCTGGG                                       |
| phpD KO R1      | GGCGCGCCGAATTCAACGCCCTCGGCCACGC                                            |
| phpD KO R2      | CCCAGCCGGCCAGGTCGTGAGCGAGCTTGAACGGG                                        |
| phpE KO F1      | GGCGCGCCGAATTCCTGAACAACGGCCACCTC                                           |
| phpE KO F2      | CTACACCGACCCCGCTGGACCCCGCCGGCCGAGGG                                        |
| phpE KO R1      | GGCGCGCCGGATCCCCCTGCACCGGCGCGAG                                            |
| phpE KO R2      | CCCTCGGCCGGCGGGGTCCAGGCGGGGTCGGTGTAG                                       |
| phpF KO F1      | GGCGCGCCTCTAGACTGGGCAACATGACCAAC                                           |
| phpF KO F2      | GCAGATCGCCGGGACGGGCGGAATCGATGAGCGCATCC                                     |
| phpF KO R1      | GGCGCGCCGAATTCGCGCTCGGCCGGGTCCG                                            |
| phpF KO R2      | GGATGCGCTCATCGATTCCGCCCGTCCCGGCATCTGC                                      |
| phpG KO F1      | GGCGCGCCTCTAGACGTGCGCGCCACGCC                                              |
| phpG KO F2      | CGGCGCCGACCGCCGGTGCTCACCGGGTCGGACGGAG                                      |
| phpG KO R1      | GGCGCGCCGAATTCCTGACCGTGCCGGCCTG                                            |
| phpG KO R2      | CTCCGTCCGACCCGGTGAGCACCGGCCGGTCGGCGCCG                                     |
| phpH KO F1      | GGCGCGCCTCTAGAGGGACCCACAGACCCGGC                                           |
| phpH KO F2      | CTCCGTACGGCTGCGCGGCTCCCTGGCGGGCCTCGTGA                                     |
| phpH KO R1      | GGCGCGCCGAATTCGGTGATCAGTCCTGTTCG                                           |
| phpH KO R2      | TCACGAGGCCCGCCAGGGAGCCGCGCAGCCTGACGGAG                                     |
| phpJ KO F1      | GGCGCGCCTCTAGAGACGCAAGGCACCTTCG                                            |
| phpJ KO F2      | CGGAGCACTGCAGCCGGCCACCCTTCCCGGCCCTACG                                      |
| phpJ KO R1      | GGCGCGCCGAATTCGCGCATGGGGACGTTGAAG                                          |
| phpJ KO R2      | CGTAGGGGCCGGGAAGGGTGGCCGGCTGCAGTGCTCCG                                     |
| phpC FOR        | GGCGCGCCTCTAGAAATAATTGGATCCAACCTTAAGAAGGAGATATACATATGACCGCTGTGT<br>TTCCCGG |
| phpC REV        | GGCGCGCCAGATCTCTATCCGCACGTCTCC                                             |
| phpD FOR        | GGCGCGCCTCTAGAAATAATTGGATCCAACCTTAAGAAGGAGATATACATATGCGGATAGAC<br>CCGTTC   |
| phpD REV        | GGCGCGCCAGATCTCTAGTTGTGTAACCC                                              |
| phpF FOR        | GGCGCGCCTCTAGAAATAATTGGATCCAACCTTAAGAAGGAGATATACATATGAGCGCCGAG<br>CAGATC   |
| phpF REV        | GGCGCGCCAGATCTTCAGGCCCGGATGCGC                                             |
| Sc rpsL5'       | GGCGCGCCAGATCTCTTCGTCCGCCACGACACG                                          |
| Sc rpsL3'       | GGCGCGCCAGATCTTTACTTCTCCTTCTTGGCGCC                                        |
| Sc rpsLG5'      | GGCGCGCCATCGATCTTCGTCCGCCACGACACG                                          |
| Sc rpsLG3'      | GGCGCGCCATCGATCGTCTTGCCCGGTCGATG                                           |
| ShygroPhpH F    | GCCATCGAGGAGATCGAC                                                         |
| ShygroPhpH R    | CGGAGAACACGTTGACCATC                                                       |
| ShygroPhpG F    | AAGGTCGTGAAGGAGTGTGG                                                       |
| ShygroPhpG R    | GGCACCCGAATCGGACT                                                          |
| FragilisPpm FOR | GGCGCGCCTCTAGAAATAATTGGATCCAACCTTAAGAAGGAGATATACATATGAACAAGAAA<br>ATC      |
| FragilisPpm REV | GGCGCGCCAGATCTTTATTTAGTGCCCGG                                              |
| FragilisPpd FOR | GGCGCGCCTCTAGAAATAATTGGATCCAACCTTAAGAAGGAGATATACATATGGTAAGTGTA<br>GAA      |
| FragilisPpd REV | GGCGCGCCAGATCTTCATGAATGCGTATC                                              |

## Supplementary Methods

**DNA manipulation, PCR, cloning and sequencing.** Plasmid constructions (Supplementary Table 1) were performed using standard techniques<sup>8</sup>. Restriction enzymes and T4 DNA ligase were purchased from Invitrogen (Carlsbad, CA) or New England Biolabs (Beverly, MA). Plasmid DNA isolation was performed using Qiagen (Valencia, CA) miniprep or maxiprep kits. DNA fragments used in cloning and for sequencing were extracted from agarose gels using the Promega (Madison, WI) SV Wizard Gel and PCR Cleanup System. *Streptomyces* genomic DNA for hybridization analysis was isolated by the CTAB method<sup>9</sup>. DNA hybridization analyses were performed using Hybond-N nylon membrane (Amersham, Buckinghamshire, UK) and results were visualized using the DIG system (Roche Applied Science, Indianapolis, IN). PCR was routinely performed using FailSafe PCR PreMix buffers (Epicentre, Madison, WI) with KOD Hotstart DNA proofreading polymerase (Novagen, Madison, WI). *Streptomyces* colony PCR was performed using the method of Van Dessel *et al.*<sup>10</sup>. The oligonucleotides used in this study (Supplementary Table 2) were purchased from Integrated DNA Technologies (Coralville, IA). Portions of *Streptomyces hygroscopicus* PTT biosynthetic genes were amplified from chromosomal DNA by PCR and products were sequenced using the same primers used for amplification at the W.M. Keck Center for Comparative and Functional Genomics at the University of Illinois.

**Deletion of PTT biosynthetic genes in *S. viridochromogenes*.** Deletion mutants of PTT genes in *S. viridochromogenes* were constructed using *rpsL* dominance in a



selection/counter-selection scheme<sup>11</sup> that results in unmarked deletions (Fig. S1).

Mutagenesis was performed essentially as described elsewhere<sup>12</sup> except that the plasmids we used required Apr instead of Thio as the initial selective agent. To isolate a Str<sup>R</sup> *S. viridochromogenes* mutant for deletion analysis, wild-type spores ( $\sim 7.2 \times 10^8$ ) were applied to ISP2 Str<sup>20</sup> plates. Resulting resistant colonies arose at a frequency of  $\sim 6.6 \times 10^{-8}$  and were streaked to ISP2 Str<sup>100</sup> to ensure stable streptomycin resistance. A subset of Str<sup>R</sup> *S. viridochromogenes* isolates were examined for continued PTT production and sporulation. Based upon these criteria, one Str<sup>R</sup> mutant, *S. viridochromogenes str-5*, was selected and subsequently used as parent for making all of the deletion mutants described here.

For our deletion experiments, we constructed two similar (*rpsL*<sup>+</sup>) vectors, pJVD39 or pJVD52.1. Both are based upon the *Streptomyces*-*E. coli* shuttle vector pKC1139, which contains a *Streptomyces*-specific temperature-sensitive origin of replication and an apramycin resistance marker (*aac*(3)IV) for selection in both *Streptomyces* and *E. coli*. Plasmids pJVD39 and pJVD52.1 both contain the *rpsL*<sup>+</sup> gene of *Streptomyces coelicolor* (*rpsLG*<sup>+</sup> in pJVD39) that allows for a dominant streptomycin-sensitive phenotype in an *rpsL* (Str<sup>R</sup>) background. The regions of homology necessary to delete genes by the unmarked method were constructed by two sequential sets of PCR reactions. First, the individual upstream and downstream regions of homology were PCR amplified individually. The upstream homology regions were PCR amplified by primer pairs designated KO F1 and KO R2 and the downstream homology regions were similarly amplified using primer pairs KO F2 and KO R1. The second round of PCR was done to fuse the upstream and downstream regions by PCR overlap extension<sup>13,14</sup> to form a 'deletion cassette'. After cloning into a counter-selectable vector, the 'deletion cassettes'

are designed to delete the majority of a gene though they preserve the coding sequence of the first 10 amino acids fused in frame with sequence encoding the last 9 amino acids plus stop codon (Supplementary Figure 10). This results in a severely truncated gene product when translated, but preserves the coding sequences of flanking genes and minimizes the likelihood of polar effects. This was done because previous analysis of the PTT biosynthetic gene cluster indicated that many genes appeared to have start codons within the ends of upstream genes<sup>3</sup> and we did not want to delete bases common to other genes.

Deletion plasmids based upon the *Streptomyces-E. coli* shuttle vectors pJVD39 or pJVD52.1 were conjugated from the *E. coli* donor WM3780 to *S. viridochromogenes str-5*, selecting for Apr<sup>R</sup> colonies at 30 °C. After streaking exconjugants on medium containing Apr<sup>30</sup> and NaI<sup>25</sup> (to select against the *E. coli* donor), individual colonies were picked to MYG liquid and grown non-selectively for at least 3 days at 39 °C to force integration of the deletion plasmids by homologous recombination. These cultures were spread to plates containing Apr at 39°C and individual colonies were streaked in parallel to medium containing Str at the same temperature. A subset of Apr<sup>R</sup> Str<sup>S</sup> colonies were cultured in MYG liquid without selection at 39°C to allow for the second recombination event. This culture was plated to ISP2 containing Str to select for segregants. Str<sup>R</sup> colonies were screened for Apr<sup>S</sup>, and Str<sup>R</sup> Apr<sup>S</sup> colonies were checked via colony PCR for the expected deletion events. Strains believed to be deletion mutants were subjected to two sequential rounds of sporulation before verification again by PCR and by DNA hybridization. In this manner, the following genes were deleted from *S. viridochromogenes str-5* (listed with the deletion vector used during mutagenesis): *phpC*

(pJVD73), *phpD* (pJVD56), *phpE* (pJVD40), *phpF* (pJVD75), *phpG* (pJVD76), *phpH* (pJVD77) and *phpJ* (pJVD78).

**Overexpression, purification and activity assay of His-PhpF.** WM5392 cells were grown in LB Cm<sup>12</sup> Amp<sup>100</sup> broth to mid-log phase at 37°C. IPTG was added to 1 mM final concentration and cells were harvested via centrifugation after 5 hours of induction. Cell pellets carrying overexpressed His-PhpF were resuspended in 50mM HEPES-Na<sup>+</sup> (pH 7.25) buffer containing 10% glycerol, 0.3 M NaCl, and 20 mM imidazole (buffer A). Cells were broken 2× in a French pressure cell (20,000 psi) and centrifuged at 13,000 × g to pellet cell debris and the resultant supernatant was added to a Ni-NTA agarose (Invitrogen) gravity flow column pre-equilibrated with buffer A. Contaminating *E. coli* proteins were washed off the column in a stepwise fashion with buffers identical to buffer A, but with varying concentrations of imidazole (10, 50, 100 and 200 mM). His-PhpF was collected from the column after washing with buffers containing 250 or 500 mM imidazole. His-PhpF after affinity chromatography was purified to apparent homogeneity, as ascertained by SDS-PAGE followed by Coomassie Brilliant Blue staining. Although the protein appeared ~7 kDa larger than the expected based on SDS-PAGE, it had a mass of 22804.4 Daltons (based on FT-MS analysis), which is in close agreement with the theoretical mass of His-PhpF (minus the amino-terminal methionine) of 22804.5 Da (2.5 ppm mass error). High-purity His-PhpF was dialyzed (Slide-A-Lyzer 10,000 MWCO, Pierce, Rockford, IL) overnight at 4 °C, with two buffer exchanges, against 50 mM HEPES-K<sup>+</sup> buffer (pH 7.25) containing 10% glycerol, 50mM sodium L-glutamate, 50 mM L-arginine monohydrochloride and 2 mM dithiothreitol (DTT). Glutamate and arginine were added to the dialysis buffer because they known to stabilize

proteins<sup>15</sup> and attempts to dialyze in the absence of these amino acids invariably led to precipitation of His-PhpF. Dialyzed protein was frozen at  $-70\text{ }^{\circ}\text{C}$  until directly used for analysis.

Initial phosphonoformate-nucleotidyltransferase activity was assayed in 50 mM HEPES- $\text{K}^+$  10 mM  $\text{MgCl}_2$  buffer (pH 7.25) containing 1 mM CTP, 1 mM PF, 5U of yeast inorganic pyrophosphatase (Sigma) and 5  $\mu\text{g}$  of His-PhpF. Reactions were incubated at  $30\text{ }^{\circ}\text{C}$  for 1 hour before analysis by  $^{31}\text{P}$  NMR or LC/MS. Data from LC/MS experiments were acquired by sample separation on a Thermo Surveyor HPLC using a 2.1 mm x 50 mm Hypercarb column (ThermoFisher Scientific) operated at 500  $\mu\text{L}/\text{minute}$ . A 30 minute gradient (100:0 A:B to 70:30 A:B where A was 25 mM ammonium acetate, pH 4 and B was acetonitrile + 0.1% acetic acid) was employed to separate the nucleotide from buffer salts. The eluent was directly infused into a LTQ-FT mass spectrometer where high-resolution Fourier-Transform mass spectrometry (FT-MS) data were acquired in positive ion mode.

**Creation of a *Streptomyces* host for His-PhpC overexpression.** His-PhpC was over-expressed in *Streptomyces lividans* using the “ $\text{P}_{nitA}$ -NitR” system recently developed by Herai et al<sup>6</sup>. We did not, however, directly use the published pSH19 vector for our studies because it does not have any *E. coli* functions to facilitate cloning and other common molecular methods. Instead, we modified pSH19 for use as a shuttle vector by the addition of an *E. coli* origin of replication (*oriR6K*) and resistance marker (*bla*). To facilitate *Streptomyces* strain construction, an origin of conjugal transfer (*oriT*) was also added, giving rise to the generally useful shuttle vector pJVD53. pJVD53 was used for

over-expression of HisPhpC after cloning *hisphpC* under control of  $P_{nitA}$  (pJVD63). The *S. lividans* over-expression strain, WM6409, was created by conjugation of pJVD63 from the *E. coli* donor WM6026 essentially as previously described<sup>12</sup>. The culture conditions for WM6026 differ from that of the other conjugal donor used in this study, WM3780, because it requires supplementation with 0.1mM diaminopimelic acid to overcome the *dap* auxotrophy (See Supplementary Table 1). This particular donor strain was used in this experiment for two reasons. First, pJVD63 requires the *pir* gene product supplied *in trans* for replication in *E. coli* hosts, an element not found in most available conjugal donors. Second, pJVD63 contains the *bla* gene for ampicillin selection, an antibiotic to which most conjugal donor strains are resistant.

**Overexpression, purification and assay of His-PhpC.** WM6409 mycelia grown on ISP2 Thio<sup>50</sup> plates were used to inoculate 15 ml MYG Thio<sup>25</sup> medium in a 125 ml Erlenmeyer flask equipped with 5 mm glass beads, giving rise to a starter culture. After 3 days, the starter culture was homogenized to break up mycelial aggregates and 100  $\mu$ l was used to inoculate 1 L YEME (0.5% glycine) Thio<sup>25</sup> in a 3 L baffled flask. The culture was grown on a flatbed shaker for 72 hours at 30 °C prior to the addition of  $\epsilon$ -caprolactam to 8.8 mM (final concentration) to induce His-PhpC over expression. After addition of the inducer, the culture was returned to the shaker for 24 hours before harvesting. Cells were harvested by centrifugation, re-suspended in 50 mM HEPES, 300 mM NaCl, 10% glycerol, 20 mM imidazole buffer (pH 7.25, Buffer A), and incubated on ice for 30 minutes after addition of lysozyme to 1 mg/mL final concentration. Cells were then broken 2 $\times$  in a chilled French pressure cell (20,000 psi) and the lysate was cleared

of cell debris and insoluble protein *via* centrifugation for 30 minutes at 13,000× *g* at 4°C. Cleared supernatant was added to a column pre-equilibrated with lysis buffer containing 7 mL Ni-NTA affinity resin. Contaminating *S. lividans* proteins were washed off the column in a stepwise fashion with buffers identical to buffer A, but with either 50 or 100 mM imidazole. His-PhpC was eluted from the column after washing with buffer containing 200 or 250 mM imidazole. Protein was desalted using Zeba Desalt Spin Columns (7000 Dalton exclusion, Pierce) pre-equilibrated with storage buffer (50 mM HEPES, 10% glycerol, 100 mM NaCl, 2 mM DTT pH 7.25) and was frozen at -70 °C until use. His-PhpC was estimated to be at least 90+% pure by visual inspection of protein separated by SDS-PAGE and stained with Coomassie Brilliant Blue. His-PhpC activity assays were carried out at 30°C (1 hour) in 50 mM HEPES, 10% glycerol pH 7.25 buffer containing 91.5 µg purified protein, ~0.8 mM (estimated) enzymatically produced PnAA, and 1 mM reduced cofactor (NADH or NADPH). PnAA conversion to HEP was monitored both by <sup>31</sup>P NMR and LC/MS.

**Overexpression and assay of PhpD.** WM6047 cells were grown in LB Cm<sup>12</sup> Amp<sup>100</sup> broth to mid-exponential phase at 37°C. The culture was cold-shocked in an ice-water bath for 10 minutes, and IPTG was added to 1 mM final concentration. The culture was grown at 18 °C for an additional 21 hours before harvesting. Induced cells suspended in 50 mM HEPES, 10% glycerol buffer (pH 7.25) were broken 2× in a chilled French pressure cell (20,000 psi), and lysates were cleared of cell debris and insoluble protein *via* centrifugation for 30 minutes at 13,000× *g* at 4 °C. PhpD over expression was verified *via* SDS-PAGE. Assay of hydroxyethylphosphonate converting activity was performed at

30 °C in 50 mM HEPES, 10% glycerol buffer (pH 7.25) after addition of 1 mM HEP and 0.78 mg protein from WM6047 extract. HEP conversion to HMP was monitored both by <sup>31</sup>P NMR and LC/MS with conditions as mentioned above.

**Phosphonic acids.** Sodium phosphonoformate hexahydrate (95+% pure) was obtained from Alfa Aesar (Ward Hill, MA) and used without further purification. 2-aminoethylphosphonic acid and aminomethylphosphonic acid (99+% pure) were purchased from Sigma (St. Louis, MO). Sodium phosphite (98+% pure) was purchased from Riedel-de Haën (Seelze, Germany). The chemical syntheses of hydroxyethylphosphonate and hydroxymethylphosphonate are described below, as is the enzymatic synthesis of phosphonoacetaldehyde.

**Enzymatic production of phosphonoacetaldehyde.** Phosphonoacetaldehyde (PnAA) was enzymatically synthesized from phosphoenolpyruvate (PEP) by modification of the previously published method of Zhang *et al*<sup>16</sup>. Enzymatic activity for the production of the aldehyde was supplied from the extract of *E. coli* strain (WM4491) that carries genes for both phosphoenolpyruvate mutase and phosphonopyruvate decarboxylase (from *Bacteroides fragilis*) on plasmid pJVD18. The strain was grown in TYE Cm<sup>12</sup> Amp<sup>100</sup> broth at 30°C to mid-exponential phase and was induced for protein synthesis by addition of IPTG (1 mM final concentration). Cultures were induced for 6 hours before harvest. The cell pellet carrying the over expressed proteins was re-suspended in 50 mM HEPES-K<sup>+</sup> 10 mM MgCl<sub>2</sub> pH 7.25 buffer and lysed in a chilled French pressure cell. Lysates were centrifuged at 13,000 × g for 30 minutes at 4°C to remove cell debris and cell

extracts were used immediately without further processing to provide enzymatic activity.

Protein expression was verified by sodium dodecyl sulfate-polyacrylamide gel

electrophoresis (SDS-PAGE).

PnAA was routinely produced in reactions consisting of 10 mM PEP (PEP potassium

salt; 99+% pure, Acros), 1.5 mM thiamine pyrophosphate (Sigma) and 1/10<sup>th</sup> final assay

vol. of WM4491 extract in 50 mM HEPES-K<sup>+</sup> 10mM MgCl<sub>2</sub> pH 7.25 buffer. Reactions

were incubated for 1 hour at 30 °C and protein was removed from the reaction by

filtration through a 3 kDa molecular cut off filter (Microcon, Amicon, Beverly MA). The

resulting filtrate was analyzed for PEP conversion to PnAA by <sup>31</sup>P NMR analysis. After

<sup>31</sup>P NMR verification, PnAA was directly used in assays.

**Chemical synthesis of hydroxyethylphosphonate (HEP):** To a solution of dibenzyl phosphite (0.524 g) in dimethylformamide (20 mL) was added cesium carbonate (1.96 g) and tetrabutylammonium iodide (2.42 g). The suspension was stirred at room temperature for 1 h, followed by addition of benzyl 2-bromoethyl ether (216 mg). The mixture was stirred at room temperature for two days. The resulting white suspension was diluted with water (30 mL) and extracted with ethyl acetate (3× 30 mL). The organic layer was washed with water (3× 30 mL) and brine (30 mL). The crude product was purified by silica gel chromatography eluting with hexane/EtOAc (1:2) to give a colorless liquid (326 mg, 83%). To this product (103 mg) was added palladium on carbon (20 mg) in methanol (5 mL). The suspension was stirred at room temperature under hydrogen atmosphere overnight. The resulting suspension was filtered, and the filtrate was concentrated to give



a colorless liquid (31 mg, 97%).  $^1\text{H}$  NMR (400 MHz,  $\text{CDCl}_3$ )  $\delta$  3.60 (dt,  $J = 12.4, 7.2$  Hz, 2H), 1.85 (dt,  $J = 18.0, 7.2$  Hz, 2H).  $^{31}\text{P}$  NMR (162 MHz,  $\text{CDCl}_3$ )  $\delta$  27.7.

#### **Chemical synthesis of hydroxymethylphosphonate (HMP):** Diethyl

hydroxymethylphosphonate was purchased from Aldrich (Milwaukee, WI). The ethyl esters were hydrolyzed by adding 10 mL of 6 M HCl to 1.0 g of starting material. The mixture was heated at reflux for 12 h and then cooled to room temperature. Water and HCl were carefully removed under reduced pressure to produce a sticky oil, which solidified slowly at room temperature to give a white solid (0.66g, 99%).  $^1\text{H}$  NMR (500 MHz,  $\text{CDCl}_3$ )  $\delta$  3.60 (d,  $J = 7.5$  Hz)  $^{31}\text{P}$  NMR (162 MHz,  $\text{CDCl}_3$ )  $\delta$  22.8.

#### **Supplementary Data**

##### **Additional structural data for the intermediate CMP-5'-PF.**

Tandem mass spectrometry ( $\text{MS}^2$ ) detected a fragment (HRMS ( $m/z$ ):  $[\text{M}+\text{H}]^+$  calcd for  $\text{C}_9\text{H}_{16}\text{N}_3\text{O}_{10}\text{P}_2$ , 388.0305; found 388.0314) that corresponds to the loss of  $\text{CO}_2$  from CMP-5'-PF, likely from the terminal phosphonoformate moiety

#### **Supplementary References:**

1. Vasavada, K. V., Ray, B. D. & Nageswara Rao, B. D.  $^{31}\text{P}$  NMR lineshapes of  $\beta\text{-P}$  (ATP) in the presence of  $\text{Mg}^{2+}$  and  $\text{Ca}^{2+}$ : Estimate of exchange rates. *Journal of Inorganic Biochemistry* 21, 323-335 (1984).
2. Miller, V. L. & Mekalanos, J. J. A novel suicide vector and its use in construction of insertion mutants: osmoregulation of outer membrane proteins and virulence determinants in *Vibrio cholerae* requires *toxR*. *Journal of Bacteriology*. 170, 2575-2583 (1988).

3. Blodgett, J. A., Zhang, J. K. & Metcalf, W. W. Molecular cloning, sequence analysis, and heterologous expression of the phosphinothricin tripeptide biosynthetic gene cluster from *Streptomyces viridochromogenes* DSM 40736. *Antimicrob Agents Chemother* 49, 230-240 (2005).
4. Woodyer, R. D. et al. Heterologous production of fosfomycin and identification of the minimal biosynthetic gene cluster. *Chemistry and Biology* 13, 1171-1182 (2006).
5. Woodyer, R. D., Li, G. Y., Zhao, H. M. & van der Donk, W. A. New insight into the mechanism of methyl transfer during the biosynthesis of fosfomycin. *Chemical Communications*, 359-361 (2007).
6. Herai, S. et al. Hyper-inducible expression system for streptomycetes. *Proc Natl Acad Sci U S A* 101, 14031-14035 (2004).
7. Bierman, M. et al. Plasmid cloning vectors for the conjugal transfer of DNA from *Escherichia coli* to *Streptomyces* spp. *Gene* 116, 43-49 (1992).
8. Sambrook, J., Fritsch, E. F. & Maniatis, T. *Molecular Cloning: A Laboratory Manual* (Cold Spring Harbor Laboratory Press, Cold Spring Harbor, NY, 1989).
9. Keiser, T., Bibb, M. J., Buttner, M. J., Chater, K. F. & Hopwood, D. A. *Practical Streptomyces Genetics* (John Innes Centre, Norwich, England, 2000).
10. Van Dessel, W., Van Mellaert, N. & Geukens, J. A. Improved PCR-based method for the direct screening of *Streptomyces* transformants. *Journal of Microbiological Methods* 53, 401-403 (2003).
11. Hosted, T. J. & Baltz, R. H. Use of *rpsL* for dominance selection and gene replacement in *Streptomyces roseosporus*. *J Bacteriol* 179, 180-6 (1997).
12. Martinez, A. et al. Genetically modified bacterial strains and novel bacterial artificial chromosome shuttle vectors for constructing environmental libraries and detecting heterologous natural products in multiple expression hosts. *Applied and environmental microbiology*. 70, 2452-2463 (2004).
13. Horton, R. M., Hunt, H. D., Ho, S. N., Pullen, J. K. & Pease, L. R. Engineering hybrid genes without the use of restriction enzymes: gene splicing by overlap extension. *Gene* 77, 61-68 (1989).
14. Wurch, T., Lestienne, F. & Pauwels, P. J. A modified overlap extension PCR method to create chimeric genes in the absence of restriction enzymes. *Biotechnology Techniques* 12, 653-657 (1998).
15. Golovanov, A. P., Hautbergue, G. M., Wilson, S. A. & Lian, L. Y. A simple method for improving protein solubility and long-term stability. *J Am Chem Soc* 126, 8933-8939 (2004).
16. Zhang, G., Allen, K. N. & Dunaway-Mariano, D. Enzymatic synthesis of radiolabeled phosphonoacetaldehyde. *Analytical Biochemistry* 322, 233-237 (2003).
